# Supplementary material
Source: PubMed Central journal article supplement (PMC6502684)
Supplement: NIHMS1517435-supplement-1.pdf [file NIHMS1517435-supplement-1.pdf]

**Supplementary Table 1. Diagnoses, Procedures, and Drugs Used to Define Hemorrhoids**

| <b>Code Type</b>                                      | <b>Code List</b>                                                                                                                                                                                                                                                                                                                                                                                                                                                                                                                                                                                                                                                                                                                                          |
|-------------------------------------------------------|-----------------------------------------------------------------------------------------------------------------------------------------------------------------------------------------------------------------------------------------------------------------------------------------------------------------------------------------------------------------------------------------------------------------------------------------------------------------------------------------------------------------------------------------------------------------------------------------------------------------------------------------------------------------------------------------------------------------------------------------------------------|
| ICD-9-CM Diagnosis                                    | <b>455.x</b>                                                                                                                                                                                                                                                                                                                                                                                                                                                                                                                                                                                                                                                                                                                                              |
| ICD-9-CM Procedure                                    | <b>49.4x</b>                                                                                                                                                                                                                                                                                                                                                                                                                                                                                                                                                                                                                                                                                                                                              |
| Common Procedural Terminology                         | <b>45350, 45398, 46083, 46221, 46250, 46255, 46257, 46258, 46260, 46261, 46262, 46500, 46930, 46934, 46935, 46936, 46945, 46946, 46947</b>                                                                                                                                                                                                                                                                                                                                                                                                                                                                                                                                                                                                                |
| Prescription Medications<br>(brand and generic names) | <b>Anucort-HC (hydrocortisone) rectal</b><br><b>Proctofoam HC rectal</b><br><b>Proctosol HC rectal</b><br><b>Hydrocortisone acetate rectal</b><br><b>Analpram-HC rectal</b><br><b>Proctozone-HC rectal</b><br><b>lidocaine topical</b><br><b>Anusol-HC rectal</b><br><b>Analpram-HC Singles rectal</b><br><b>hydrocortisone rectal</b><br><b>hydrocortisone-pramoxine rectal</b><br><b>Proctocort rectal</b><br><b>Procto-Med HC rectal</b><br><b>lidocaine-hydrocortisone rectal</b><br><b>Procto-Pak rectal</b><br><b>lidocaine-hydrocortisone topical</b><br><b>lidocaine-hydrocortisone-aloe vera rectal</b><br><b>PramCort rectal C7</b><br><b>Procort rectal</b><br><b>Ana-Lex Kit rectal</b><br><b>Ana-Lex rectal</b><br><b>Hemmorex-HC rectal</b> |

**Supplementary Table 2. Characteristics of Individuals with Hemorrhoid-Related Claims in the 2014 MarketScan Commercial Claims and Encounters Database, by Setting of Care, Primary and Secondary Diagnoses Only**

| <b>Characteristic</b> | <b>Individuals with <math>\geq 1</math> Prescription Medication Claim<br/>N (%)</b> | <b>Individuals with <math>\geq 1</math> Physician Claim<br/>N (%)</b> | <b>Individuals with <math>\geq 1</math> Outpatient Facility Claim<br/>N (%)</b> | <b>Individuals with any Hemorrhoid-Related Claim<br/>N (%)</b> |
|-----------------------|-------------------------------------------------------------------------------------|-----------------------------------------------------------------------|---------------------------------------------------------------------------------|----------------------------------------------------------------|
| <b>Total N (%)</b>    | 119,120 (100)                                                                       | 296,857 (100)                                                         | 139,264 (100)                                                                   | 408,883 (100)                                                  |
| <b>Age</b>            |                                                                                     |                                                                       |                                                                                 |                                                                |
| <b>18-34</b>          | 26,388 (22)                                                                         | 43,304 (15)                                                           | 14,698 (11)                                                                     | 61,545 (15)                                                    |
| <b>35-44</b>          | 26,034 (22)                                                                         | 49,952 (17)                                                           | 19,094 (14)                                                                     | 68,643 (17)                                                    |
| <b>45-54</b>          | 34,369 (29)                                                                         | 101,676 (34)                                                          | 53,222 (38)                                                                     | 138,345 (34)                                                   |
| <b>55-64</b>          | 32,329 (27)                                                                         | 101,925 (34)                                                          | 52,250 (38)                                                                     | 140,350 (34)                                                   |
| <b>Sex</b>            |                                                                                     |                                                                       |                                                                                 |                                                                |
| <b>Male</b>           | 50,915 (43)                                                                         | 135,238 (46)                                                          | 59,881 (43)                                                                     | 180,589 (44)                                                   |
| <b>Female</b>         | 68,205 (57)                                                                         | 161,619 (54)                                                          | 79,383 (57)                                                                     | 228,294 (56)                                                   |

**Supplementary Table 3. Total Annual Cost of Diagnosed and Treated Hemorrhoids in the 2014 MarketScan Commercial Claims and Encounters Database, by Setting of Care, Primary and Secondary Diagnoses Only**

|                           | <b>Individuals with <math>\geq 1</math> Prescription Medication Claim</b> | <b>Individuals with <math>\geq 1</math> Physician Claim</b> | <b>Individuals with <math>\geq 1</math> Outpatient Facility Claim</b> | <b>Individuals with any Hemorrhoid-Related Claim</b> |
|---------------------------|---------------------------------------------------------------------------|-------------------------------------------------------------|-----------------------------------------------------------------------|------------------------------------------------------|
| Total N (%)               | 119,120 (29)                                                              | 296,857 (73)                                                | 139,264 (34)                                                          | 408,883 (100)                                        |
| Diagnostic claims (\$, %) | ---                                                                       | 124,731,292 (36)                                            | 220,256,534 (64)                                                      | 344,987,826 (100)                                    |
| Procedure claims (\$, %)  | ---                                                                       | 15,326,429 (48)                                             | 16,521,687 (52)                                                       | 31,848,116 (100)                                     |
| Total annual cost (\$, %) | 14,510,505 (4)                                                            | 140,057,721 (36)                                            | 236,778,222 (61)                                                      | 391,346,447 (100)                                    |

**Supplementary Table 4. Total Annual Cost of Diagnosed and Treated Hemorrhoids Standardized to the 2014 US Employer-Insured Population, by Setting of Care, Primary and Secondary Diagnoses Only**

|                           | <b>Individuals with ≥1<br/>Prescription<br/>Medication Claim</b> | <b>Individuals with ≥1<br/>Physician Claim</b> | <b>Individuals with ≥1<br/>Outpatient Facility<br/>Claim</b> | <b>Individuals with any<br/>Hemorrhoid-Related<br/>Claim</b> |
|---------------------------|------------------------------------------------------------------|------------------------------------------------|--------------------------------------------------------------|--------------------------------------------------------------|
| Total N (%)               | 725,132 (30)                                                     | 1,768,454 (72)                                 | 835,380 (34)                                                 | 2,451,012 (100)                                              |
| Diagnostic claims (\$, %) | ---                                                              | 728,520,716 (35)                               | 1,342,625,532 (65)                                           | 2,071,146,248 (100)                                          |
| Procedure claims (\$, %)  | ---                                                              | 96,141,882 (48)                                | 103,891,592 (52)                                             | 200,033,474 (100)                                            |
| Total annual cost (\$, %) | 87,793,349 (4)                                                   | 824,662,598 (35)                               | 1,446,517,124 (61)                                           | 2,358,973,071 (100)                                          |
